# Supplementary material
Source: PubMed Central journal article supplement (PMC11213656)
Supplement: NIHMS2000930-supplement-Fig_S1.pdf [file NIHMS2000930-supplement-Fig_S1.pdf]

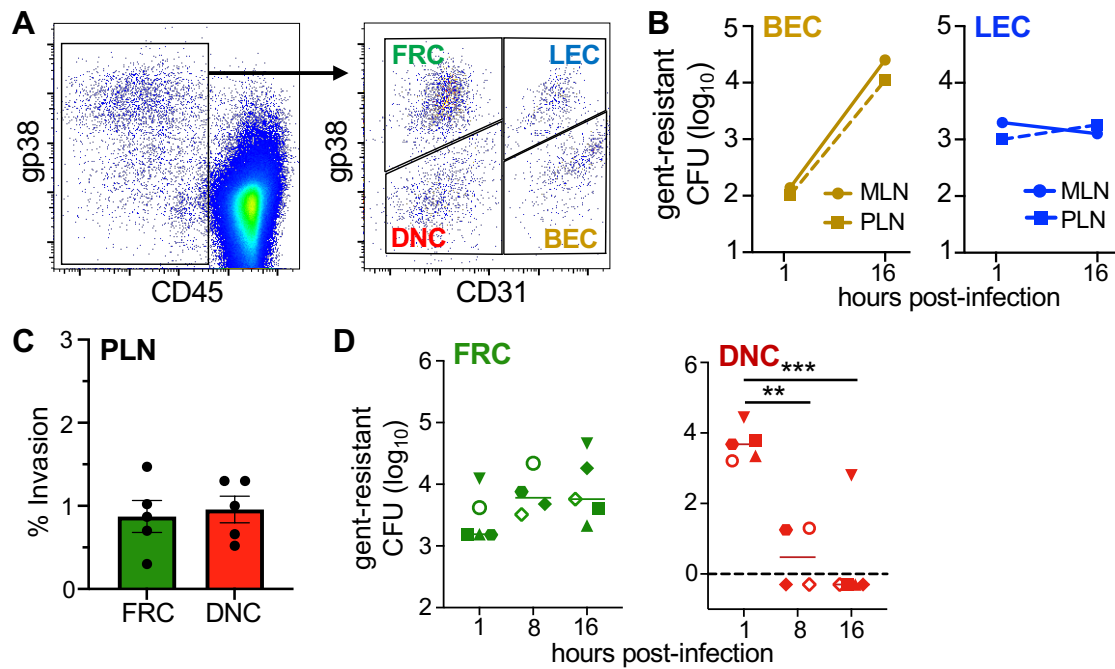

**Fig. S1 Primary fibroblastic reticular cells and blood endothelial cells isolated from murine PLN support the growth of *L. monocytogenes in vitro*.** (A) Representative dot plot indicate the gating scheme used to identify stromal populations. (B) Sorted stromal subsets isolated from PLN (peripheral lymph nodes) or pooled sMLN and cMLN were infected directly *ex vivo* with *Lm* SD2000 (MOI=10). Intracellular growth assay comparing cells isolated from MLN (solid lines) and PLN (dashed lines). Symbols represent average values for duplicate samples from a single experiment. (C) Percent invasion (mean +/- SEM) represents the fraction of the inoculum that was resistant to gentamicin after 1 hour. Pooled data from five experiments is shown. (D) Intracellular growth assay for FRC and DNC sort purified from PLN and infected directly *ex vivo*. Pooled data from six separate experiments (each designated by a different symbol) are shown; in each experiment, cells sorted from three mice were used at two time points. Horizontal lines indicate median values; Dashed line indicates the limit of detection.
