# Supplementary material
Source: PubMed Central journal article supplement (PMC11213656)
Supplement: NIHMS2000930-supplement-Fig_S2.pdf [file NIHMS2000930-supplement-Fig_S2.pdf]

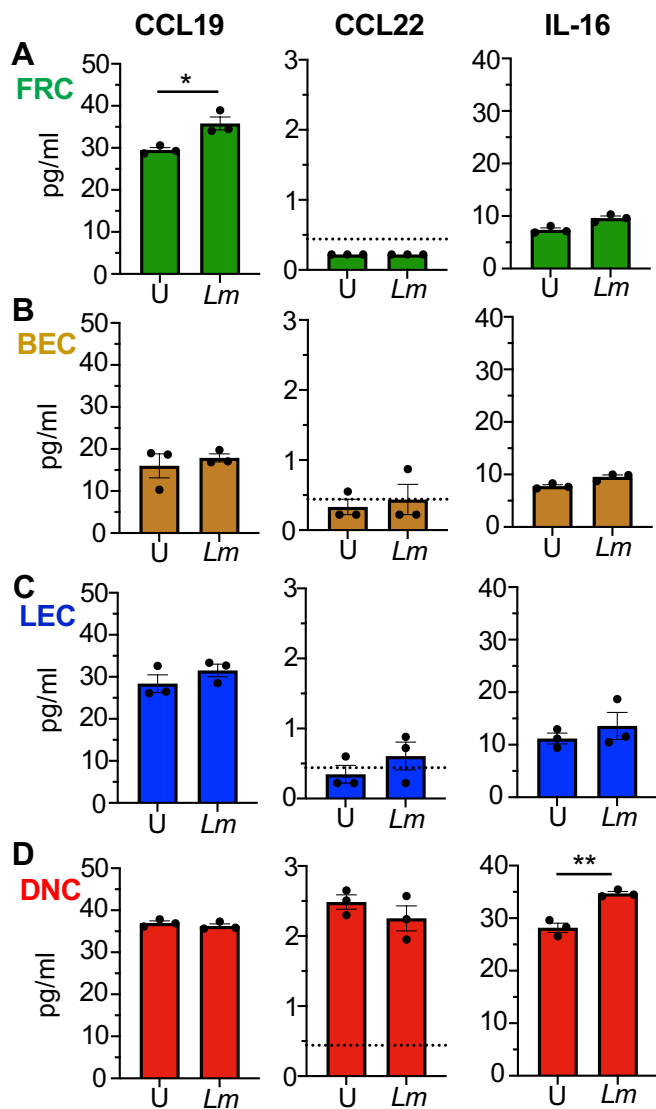

**Fig. S2 Stromal populations continually produce chemokines and cytokines important for homing of immune cells to the gut.** Supernatants were collected from uninfected (U) and *Lm*-infected (*Lm*) stromal populations ( $3 \times 10^4$  cells/well) at 16 hours for subsequent multiplex immunoassay. Symbols indicate mean values for duplicate samples collected in three independent experiments; dotted lines indicate limits of detection. Bars indicate mean values ( $\pm$  SEM) for biological replicates; statistical significance was determined by one-way ANOVA.
