# Supplementary material
Source: PubMed Central journal article supplement (PMC11213656)
Supplement: NIHMS2000930-supplement-Fig_S3.pdf [file NIHMS2000930-supplement-Fig_S3.pdf]

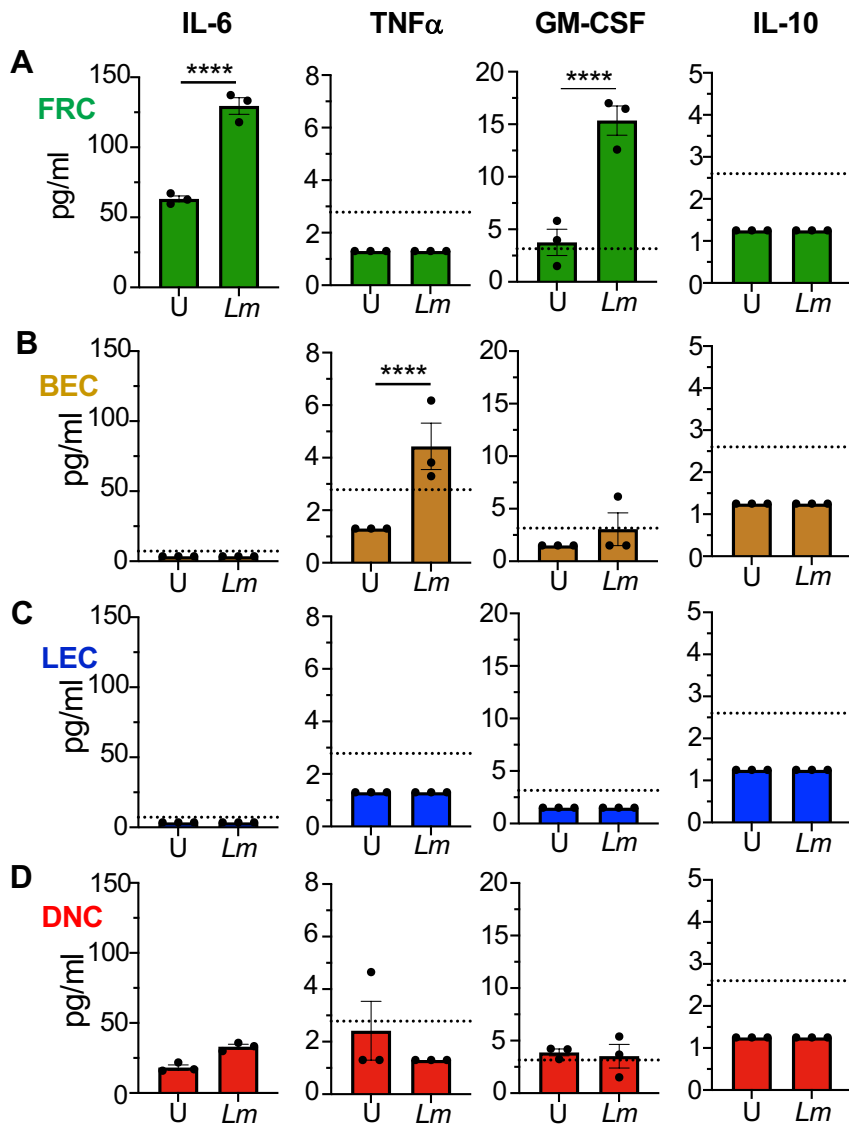

**Fig. S3 Supplementary data to support data shown in Fig. 4G.** Supernatants were collected from uninfected (U) and *Lm*-infected (*Lm*) stromal populations ( $3 \times 10^4$  cells/well) at 16 hours for subsequent multiplex immunoassay. Raw data used to determine the fold change values depicted in Fig. 4G are shown here. Symbols represent mean values for duplicate samples collected in three independent experiments; dotted lines indicate limits of detection. Bars indicate mean values for the three biological replicates; statistical significance was determined by one-way ANOVA.
